# Supplementary material
Source: PubMed Central journal article supplement (PMC2742577)
Supplement: NIHMS138282-supplement-01.pdf [file NIHMS138282-supplement-01.pdf]

**Table S1** Chemical composition of mineral nanocomposites formed after 24h mineralization as determined by semi-quantitative analysis of EDX spectra

|      | <b>Ca:P</b> | <b>Mg:P</b> | <b>Sr:P</b> | <b>F:P</b>  |
|------|-------------|-------------|-------------|-------------|
| A    | 1.55 ± 0.13 | 0.48 ± 0.10 |             |             |
| B    | 1.20 ± 0.32 | 0.28 ± 0.11 |             |             |
| G    | 1.83 ± 0.35 |             |             |             |
| H    | 0.79 ± 0.13 | 0.45 ± 0.12 |             |             |
| G-Sr | 1.36 ± 0.38 |             | 0.48 ± 0.12 |             |
| G-F  | 1.68 ± 0.34 |             |             | 1.17 ± 0.40 |

**MG-63**

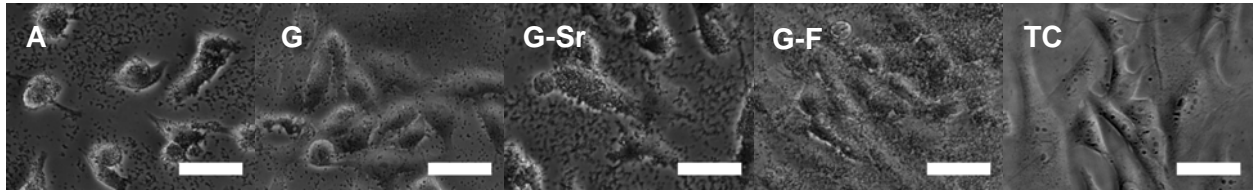

**Saos-2**

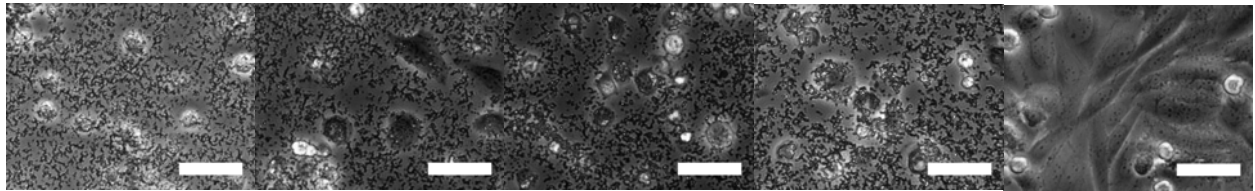

**EMT6**

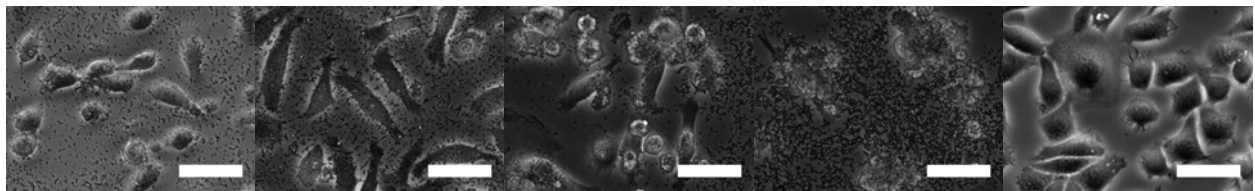

**Caco-2**

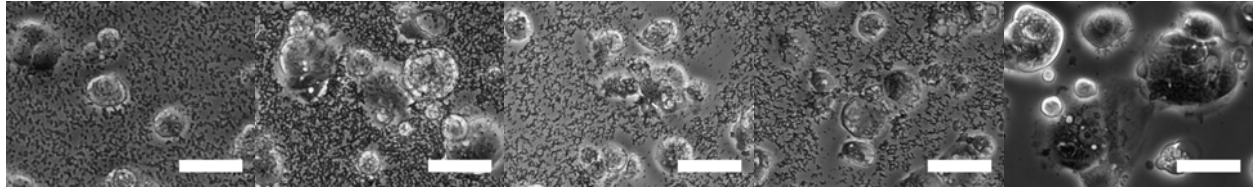

**Supplemental Fig. S1**

**Ishikawa**

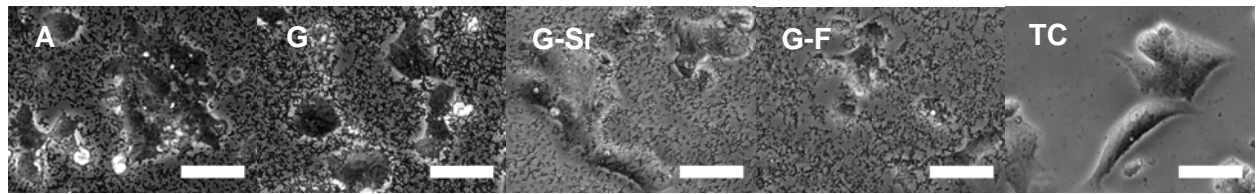

**TC1**

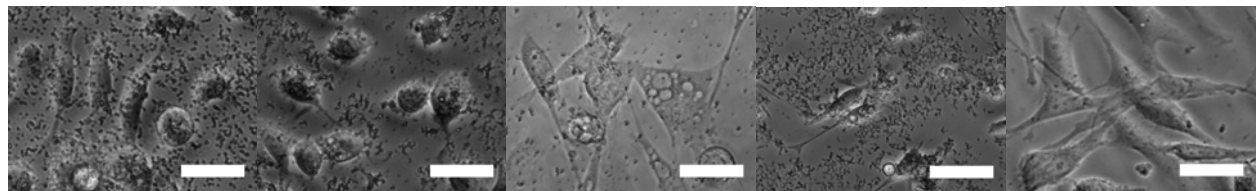

**Hela**

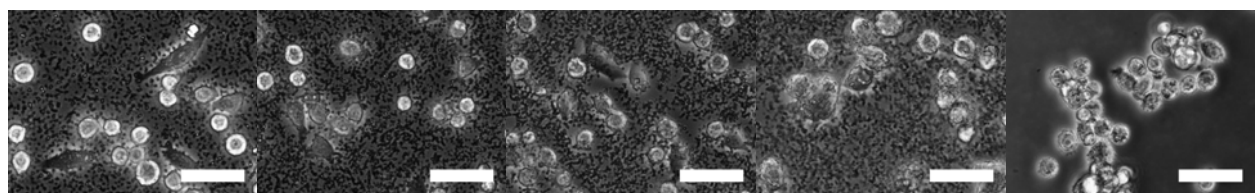

**B35**

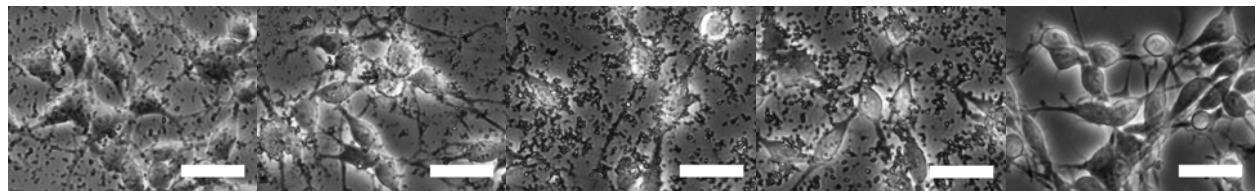

**Supplementary Fig. S1 (continued)**

### Hep G2

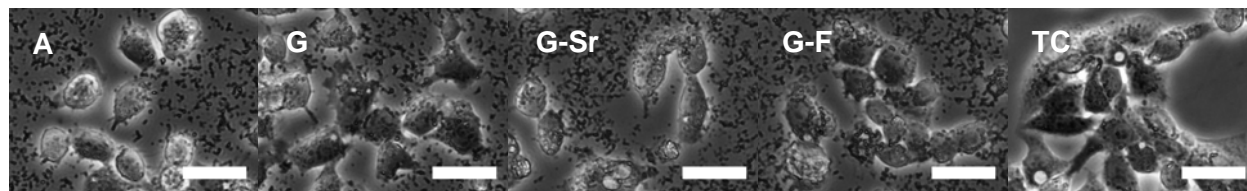

### EMT6-DOTAP

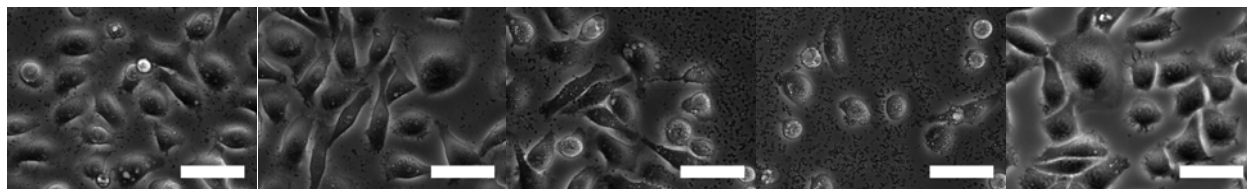

### B35-DOTAP

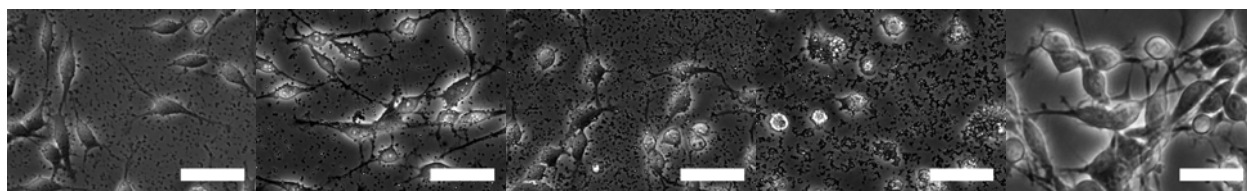

**Supplemental Fig. S1 Growth of cells on thin films of DNA/CaP nanocomposites.** Cells were cultured on surfaces coated with nanocomposites formed from the indicated mineral formulation for 12 h and imaged with bright-field microscopy. Formulations B and H are not shown as nanocomposites are similar in morphology to formulation A. Cell plated on non-coated cell-culture surface (TC) are shown for comparison. The scale bar is 50  $\mu\text{m}$ .

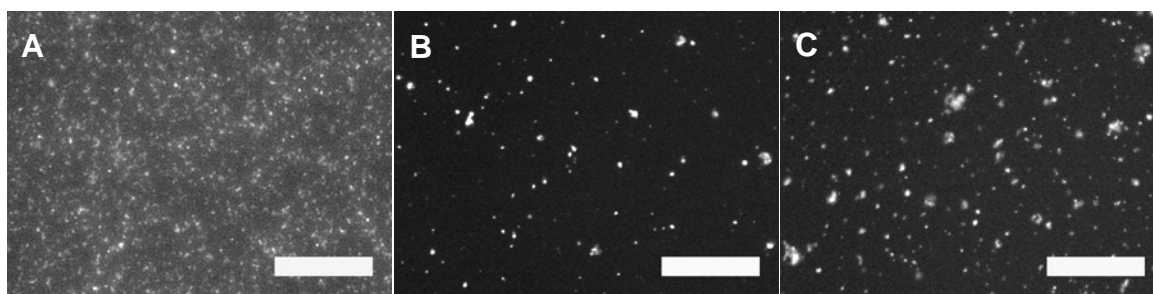

**Supplemental Fig. S2 Fluorescent microscopy images of DNA-doped nanocomposites. a,** Fluorescein-labeled DNA was co-precipitated with mineral formulation A for 8h and imaged. Fluorescein-labeled DNA was first complexed with DOTAP at a DNA:DOTAP ratio (w/w) of **b,** 1:6 or **c,** 1:12, mineralized for 8h, and imaged. The scale bar is 50  $\mu\text{m}$ .

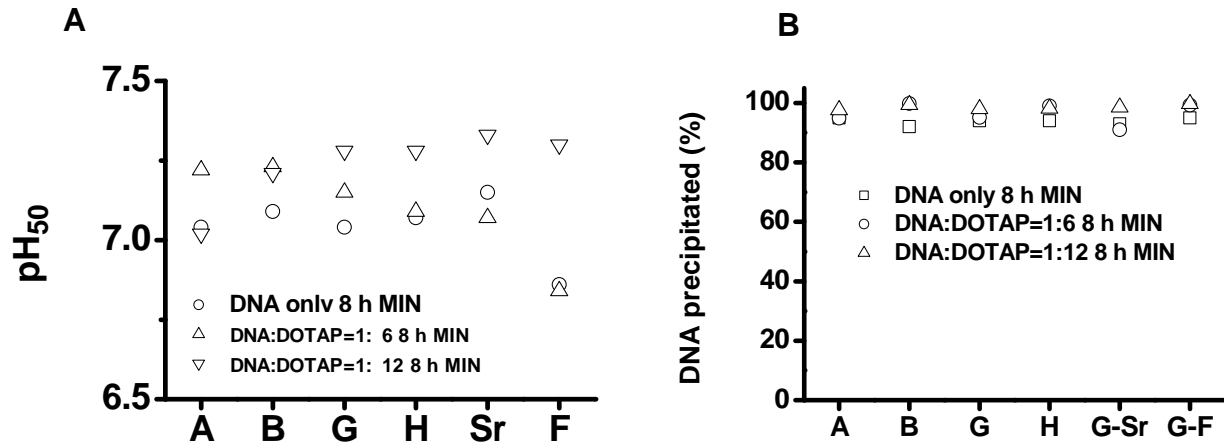

**Supplemental Fig. S3 The pH<sub>50</sub> and DNA precipitation efficiency of DNA/DOTAP-doped nanocomposites.** **a**, The pH sensitivity of modified DNA/DOTAP-doped nanocomposites. The DNA was complexed with DOTAP at DNA:DOTAP ratios (w/w) of 1:6 and 1:12 (MIN: mineralization). **b**, The DNA-DOTAP precipitation efficiency for different DNA:DOTAP ratios (w/w) at 8 h.
